# Supplementary material for: Optimizing chemistry at the surface of prodrug-loaded cellulose nanofibrils with MAS-DNP
Source: PubMed Central journal article supplement (PMC10049993; doi:10.1038/s42004-023-00852-2), 2023-03-28
Supplement: 42004_2023_852_MOESM2_ESM.pdf [file 42004_2023_852_MOESM2_ESM.pdf]

# Description of Additional Supplementary File

**File name:** Supplementary Data 1

**Description:** Solution-state NMR spectra data.
