# Supplementary material for: Optimizing chemistry at the surface of prodrug-loaded cellulose nanofibrils with MAS-DNP
Source: PubMed Central journal article supplement (PMC10049993; doi:10.1038/s42004-023-00852-2), 2023-03-28

# Compound 2

$^1\text{H}$  NMR (400 MHz,  $\text{CDCl}_3$ )

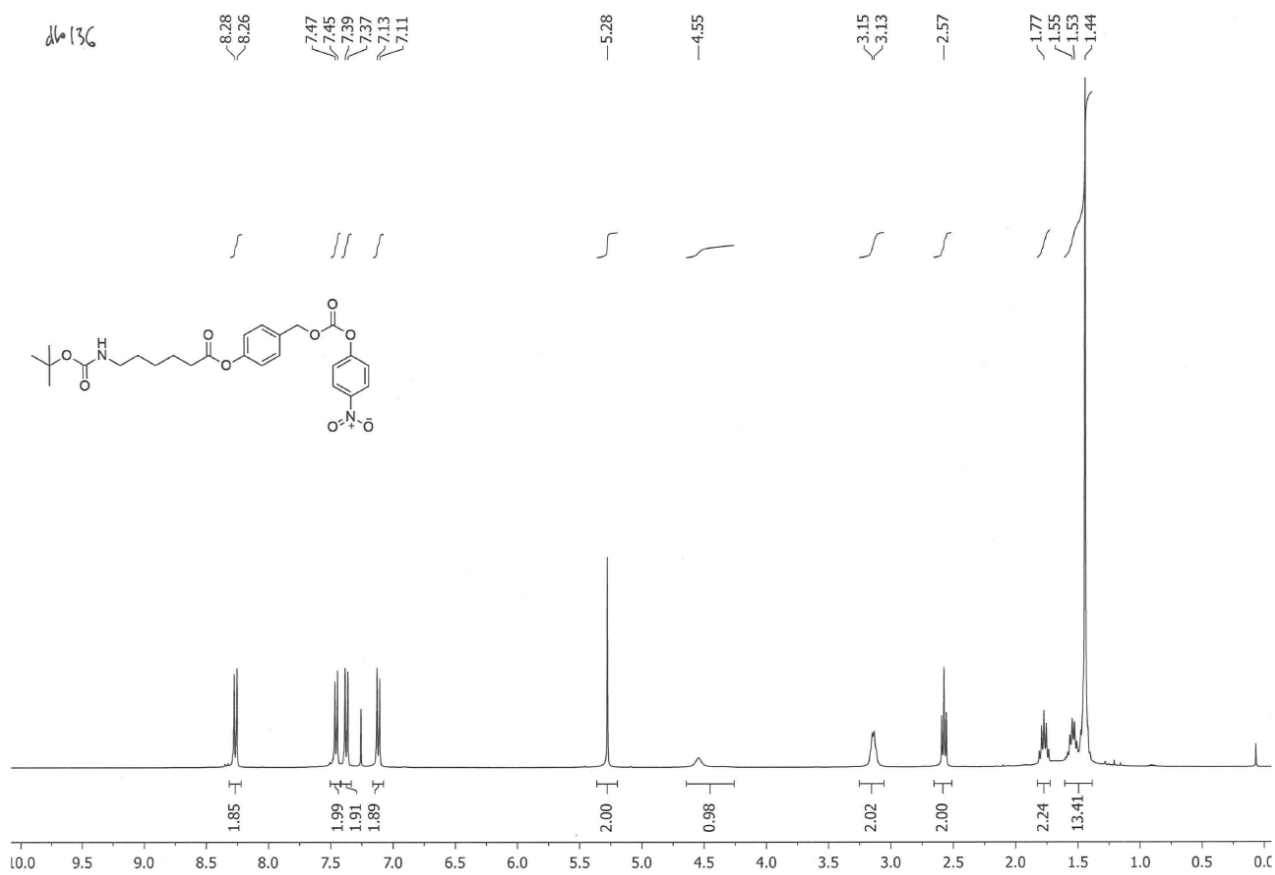

$^{13}\text{C}$  NMR (100 MHz,  $\text{CDCl}_3$ )

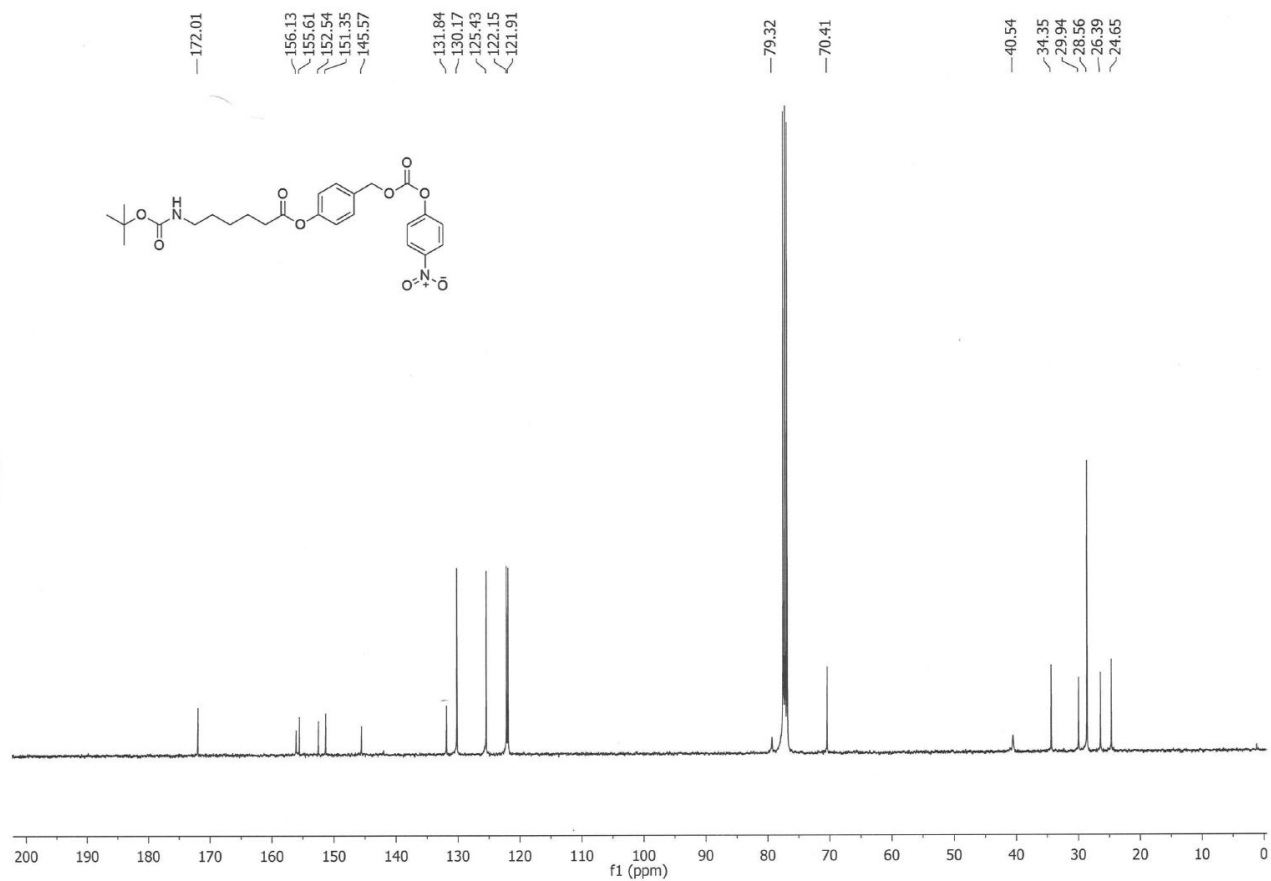

# Boc-Prodrug 3

$^1\text{H}$  NMR (400 MHz,  $\text{CDCl}_3$ )

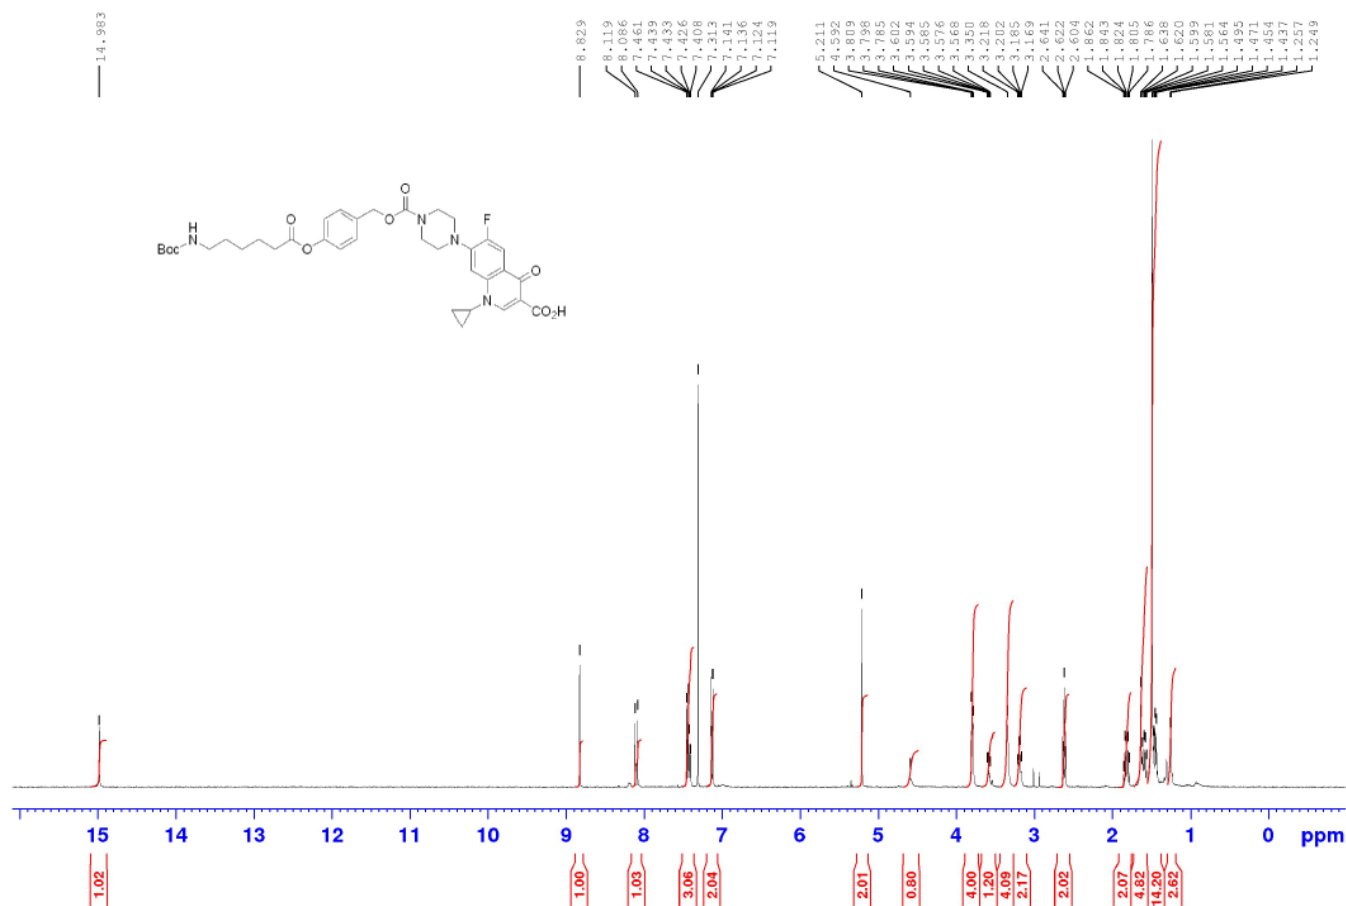

$^{13}\text{C}$  NMR (100 MHz,  $\text{CDCl}_3$ )

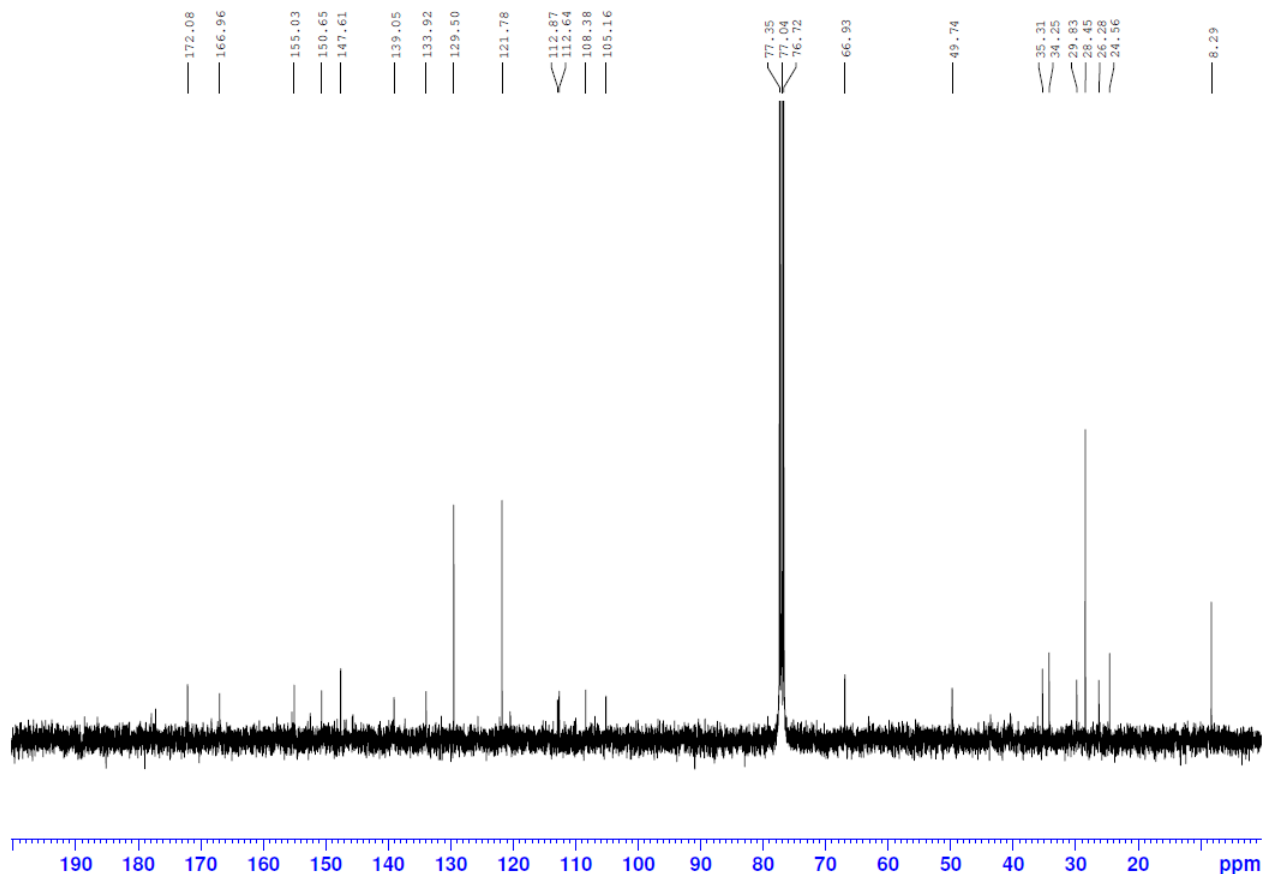

# Prodrug 4

$^1\text{H}$  NMR (400 MHz, CDOD)

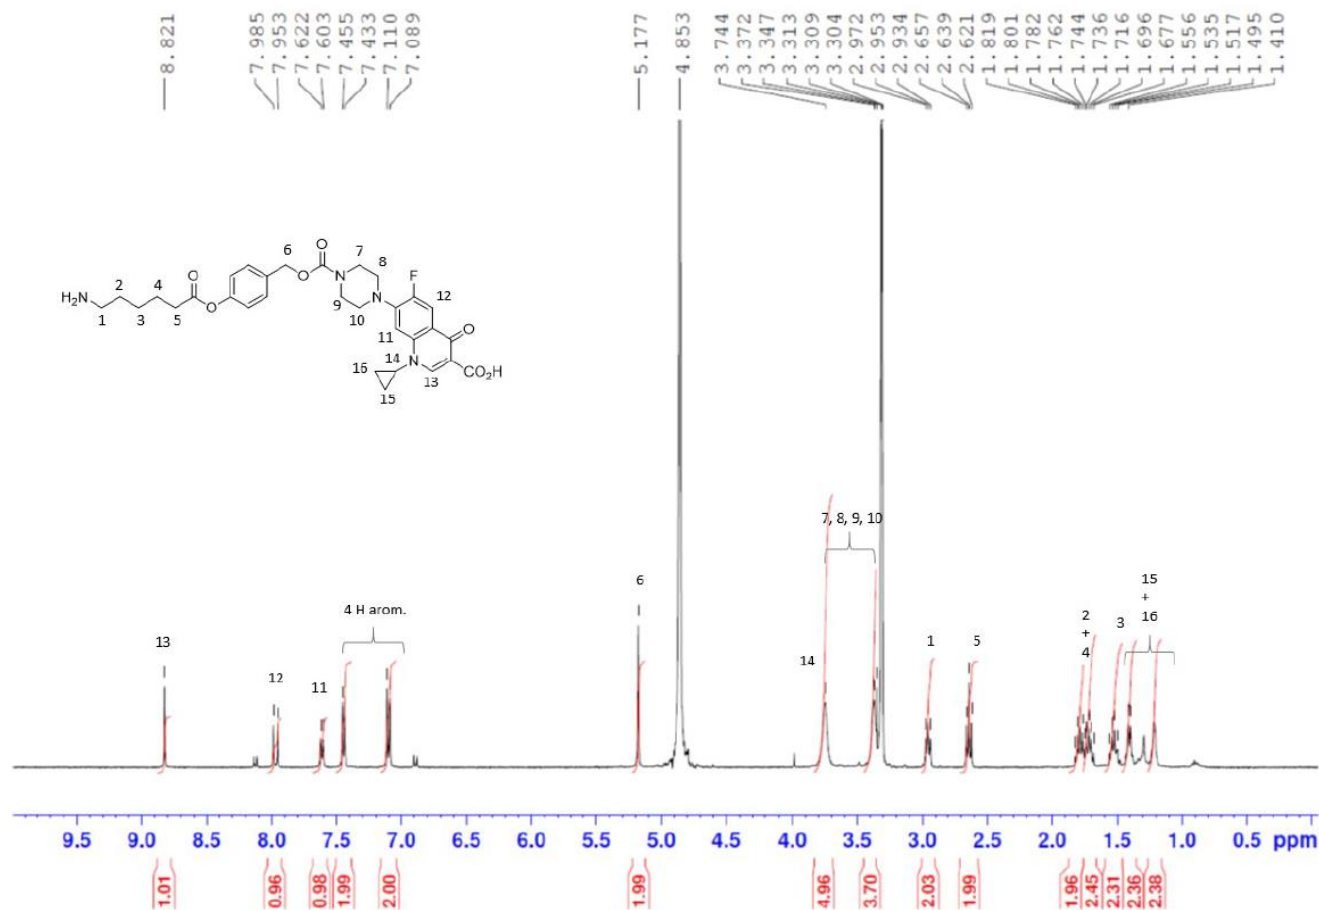

$^{13}\text{C}$  NMR ( $^{13}\text{C}\{^1\text{H}\}$ -pulprog JMOD, 100 MHz, DMSO- $d_6$ )

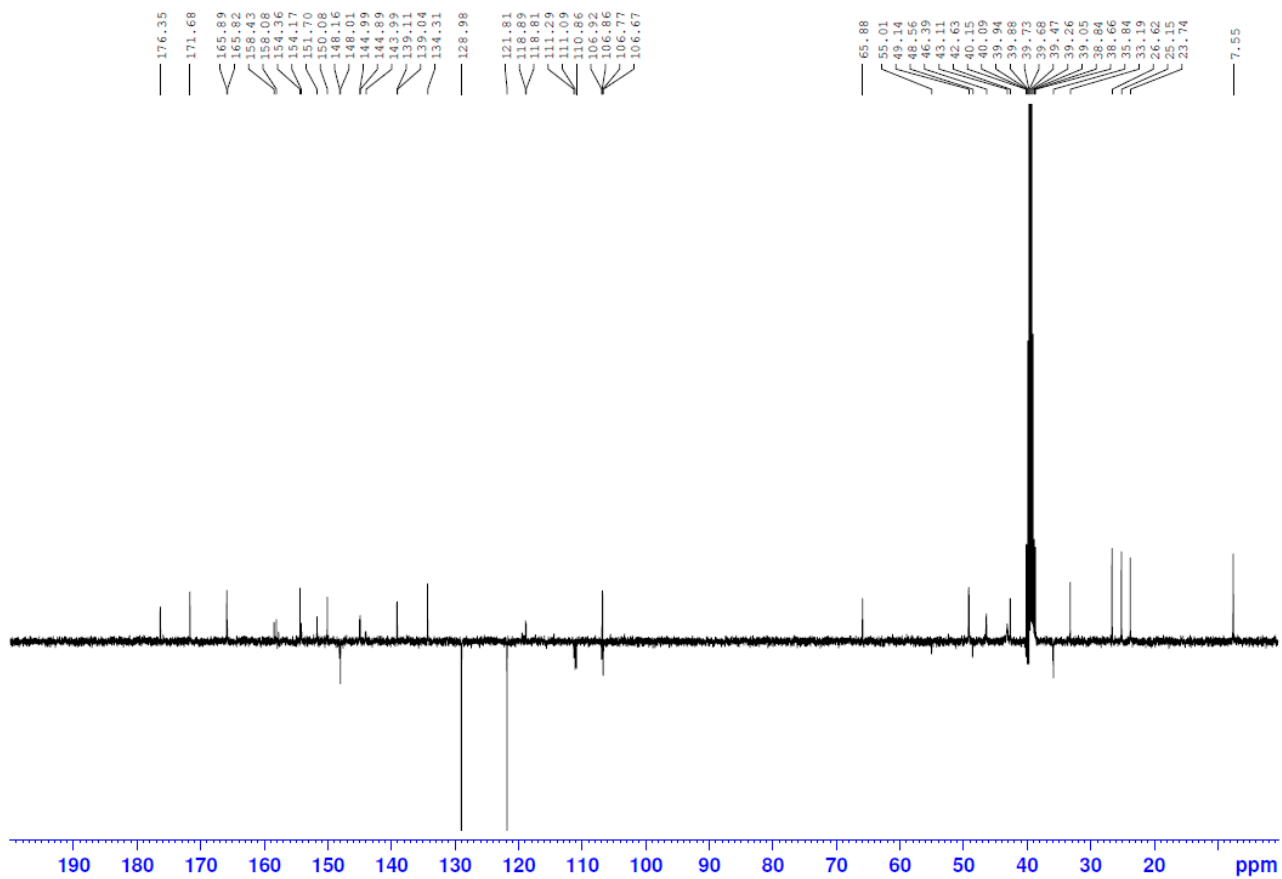

# Aminodansyl

<sup>1</sup>H NMR (400 MHz, CD<sub>3</sub>Cl)

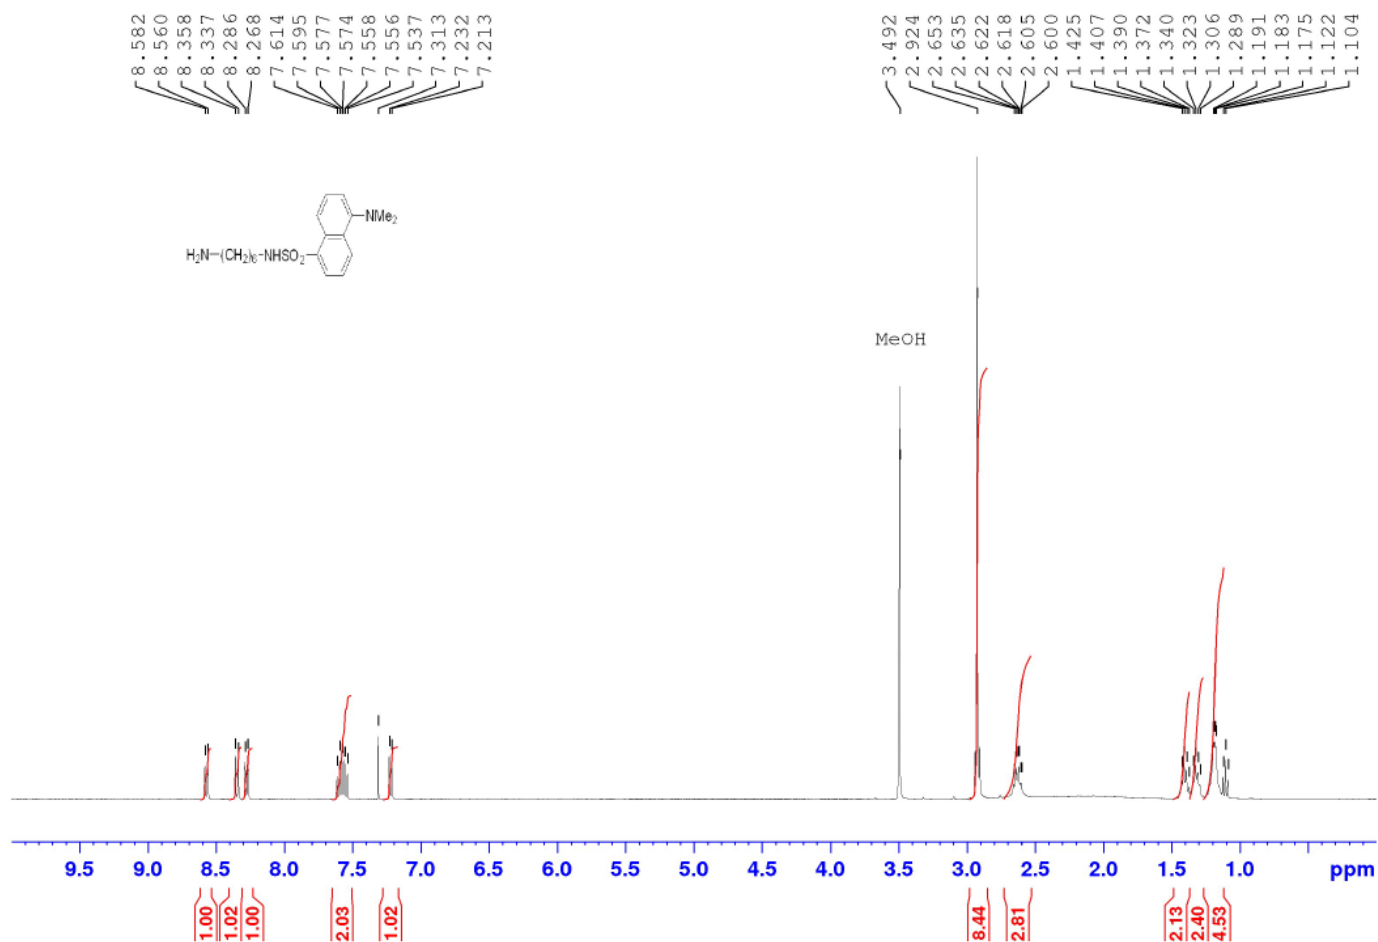

# Boc-cipro

<sup>1</sup>H NMR (400 MHz, CD<sub>3</sub>Cl)

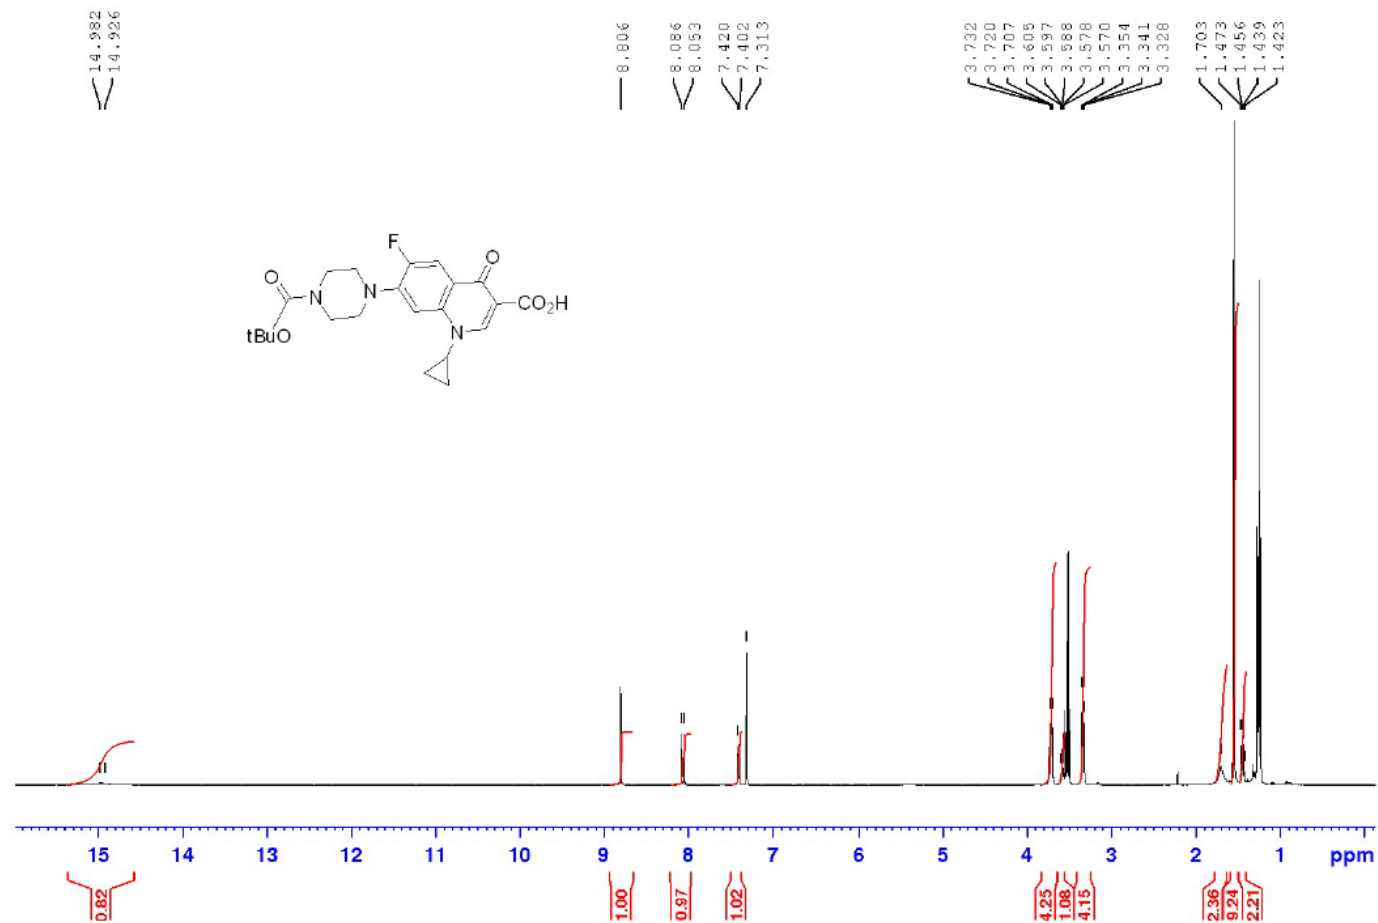

Supplement: 42004_2023_852_MOESM3_ESM.pdf [file 42004_2023_852_MOESM3_ESM.pdf]
